# Supplementary material for: “Water-in-salt” electrolytes enable the use of cost-effective aluminum current collectors for aqueous high-voltage batteries
Source: Royal Society of Chemistry journal article supplement (doi:10.1039/c6cc03969c), 2016-01-01
Supplement: c6cc03969c1.pdf [file c6cc03969c1.pdf]

## Supplementary Information

### “Water-in-salt” electrolytes enable the use of cost-effective aluminum current collectors for aqueous high-voltage batteries

R.-S. Kühnel\*, D. Reber, A. Remhof, R. Figi, D. Bleiner, and C. Battaglia

*Empa, Swiss Federal Laboratories for Materials Science and Technology, 8600 Dübendorf, Switzerland*

**Table S1** Electrochemical stability window of 1m and 21m aqueous LiTFSI solutions on gold electrodes determined by linear sweep voltammetry at a scan rate of 10 mV s<sup>-1</sup> at room temperature.

| Threshold current density (mA cm <sup>-2</sup> ) | Electrochemical stability window (V) |            |
|--------------------------------------------------|--------------------------------------|------------|
|                                                  | 1m LiTFSI                            | 21m LiTFSI |
| 0.05                                             | 1.4                                  | 2.2        |
| 0.1                                              | 1.8                                  | 2.5        |
| 0.25                                             | 2.3                                  | 3.0        |
| 0.5                                              | 2.5                                  | 3.1        |
| 1                                                | 2.7                                  | 3.2        |

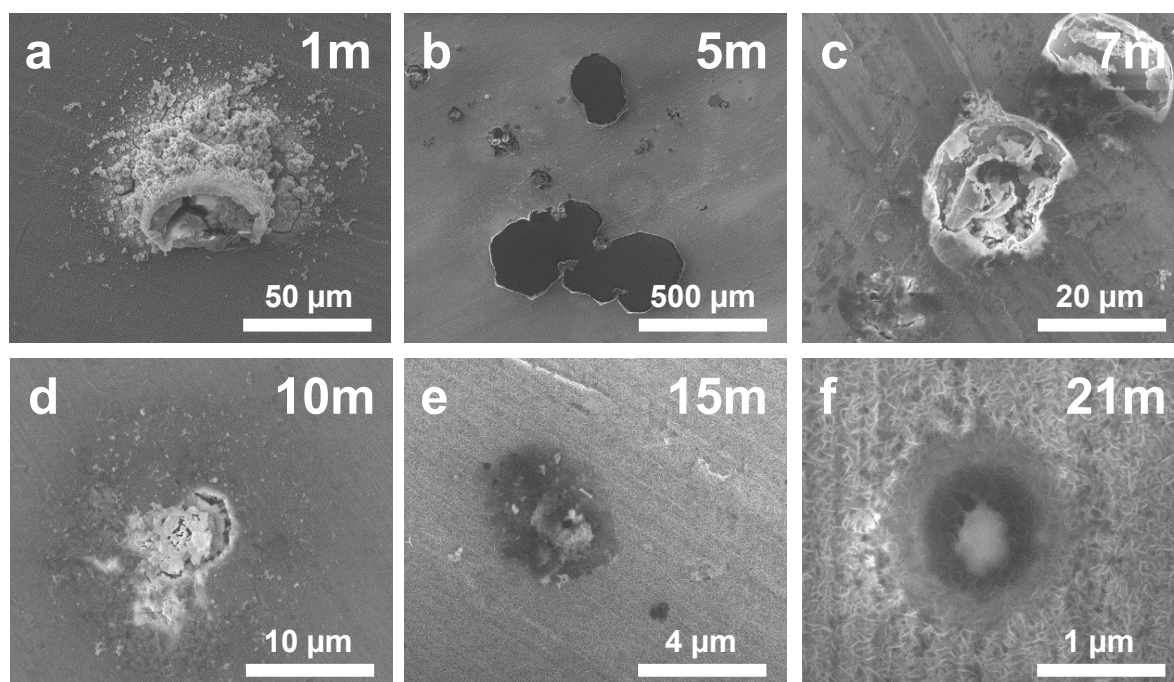

**Fig. S1** SEM images of Al electrodes polarized in aqueous LiTFSI solutions of various concentrations at 4.8 V vs. Li/Li<sup>+</sup> for 10 h (see Fig. 2d for the electrochemical data). The electrodes were relaxed for 1 min after every 9 min of polarization to reduce transport limitations. The SEM images were taken with a FEI NovaNanoSEM 230 after rinsing the electrodes with deionized water. The images illustrate the typical maximum pit diameter observed for the different LiTFSI concentrations.
